# Supplementary material for: Preparation of a low dielectric POSS/epoxy hybrid polymer without sacrificing the mechanical performance
Source: Royal Society of Chemistry journal article supplement (doi:10.1039/d3nj00632h), 2023-01-01
Supplement: d3nj00632h1.pdf [file d3nj00632h1.pdf]

## ***Supplementary Information***

### ***Preparation of a low dielectric POSS/epoxy hybrid polymer without sacrificing the mechanical performance***

Pengbo Zhang<sup>1</sup>, Kangle Xue<sup>1</sup>, Hailong Liu<sup>1</sup>, Zidie Song<sup>1</sup>, Xiaoxue Sun<sup>1</sup>, Tongjie Yao<sup>\*1</sup>  
and Li Liu<sup>\*12</sup>

1. School of Chemistry and Chemical Engineering, Harbin Institute of Technology,  
Harbin 150001, PR China
2. State Key Laboratory of Advanced Welding and Joining, Harbin Institute of  
Technology, Harbin 150001, PR China

\*Corresponding authors: Tel & fax: +86 0451-8641371, +86 10 64425439.

Email: [yaotj@hit.edu.cn](mailto:yaotj@hit.edu.cn) (Tongjie. Yao); [liuli@hit.edu.cn](mailto:liuli@hit.edu.cn) (L. Liu);

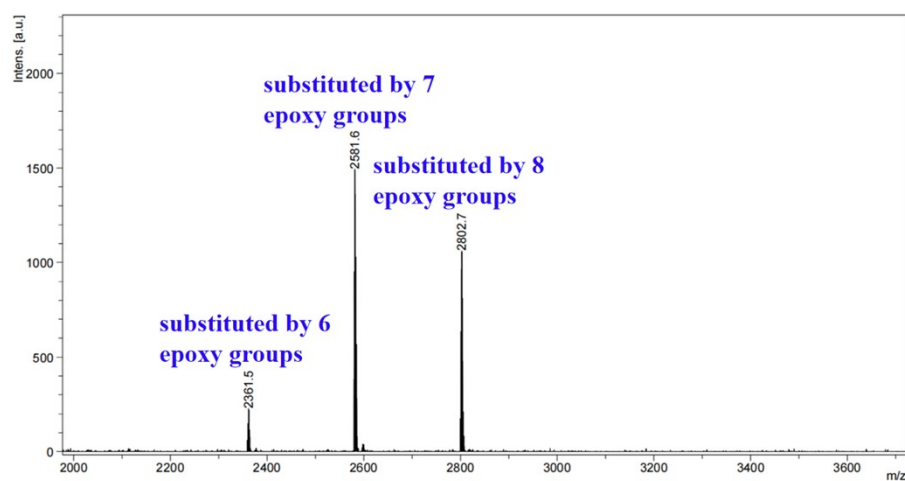

**Fig. S1.** MALDI-TOF-MS spectra of SHEP.

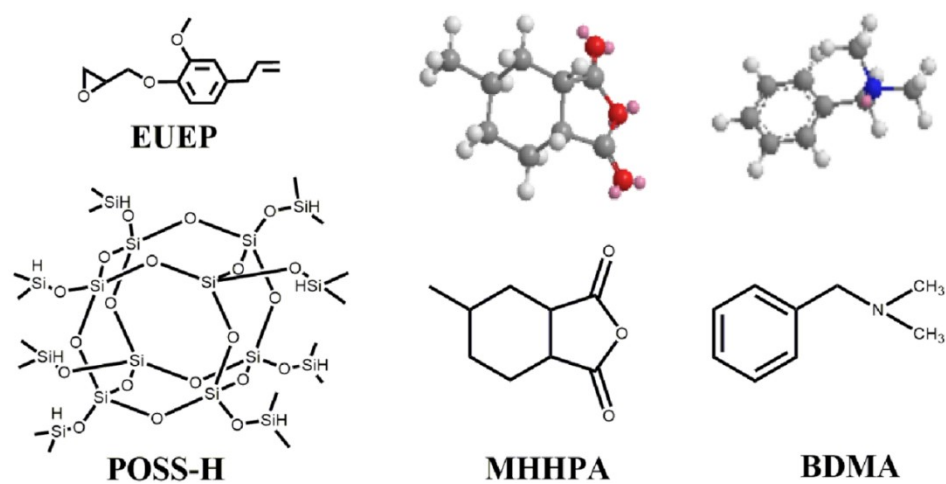

**Fig. S2.** Structures of the main chemicals.

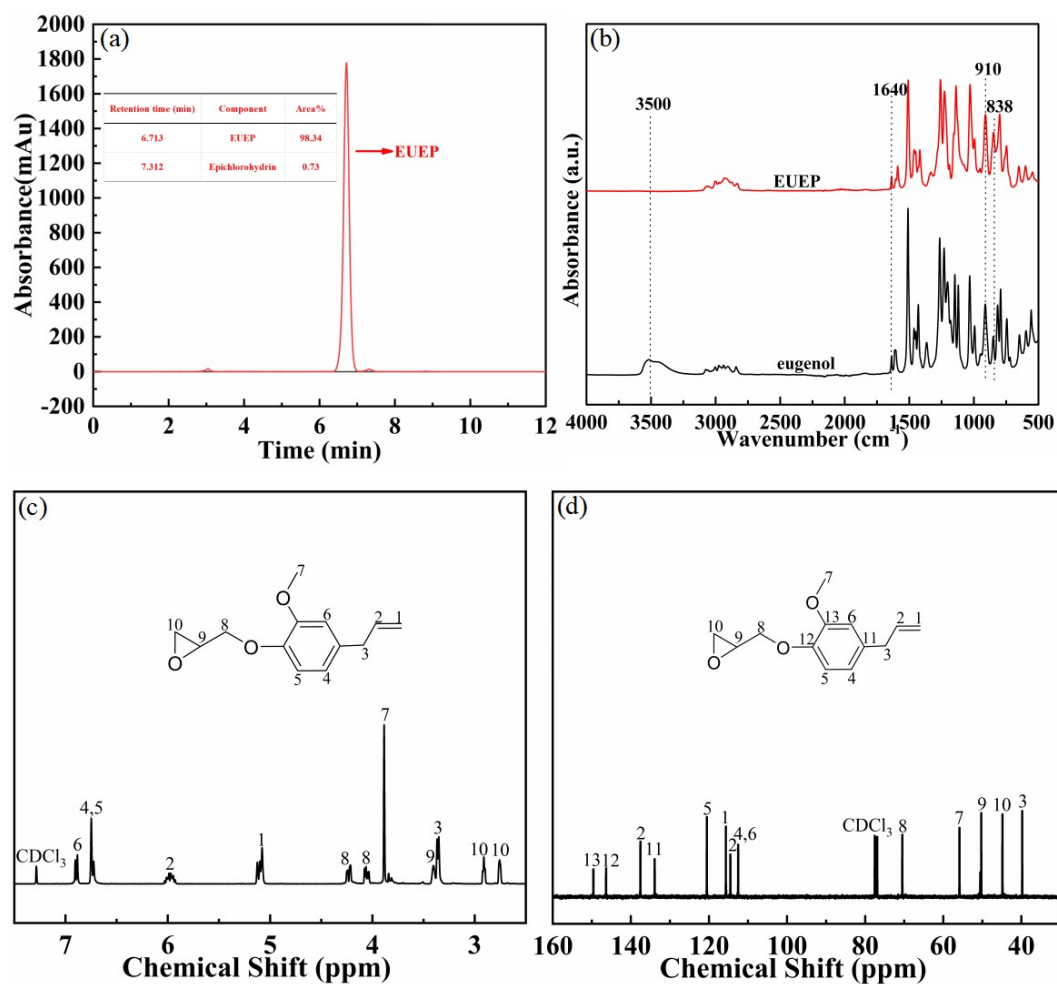

**Fig. S3.** (a) HPLC spectrum of product after epoxidation reaction of eugenol; (b) FTIR spectra of eugenol and EUEP; (c) <sup>1</sup>H-NMR and (d) <sup>13</sup>C-NMR spectra of EUEP.

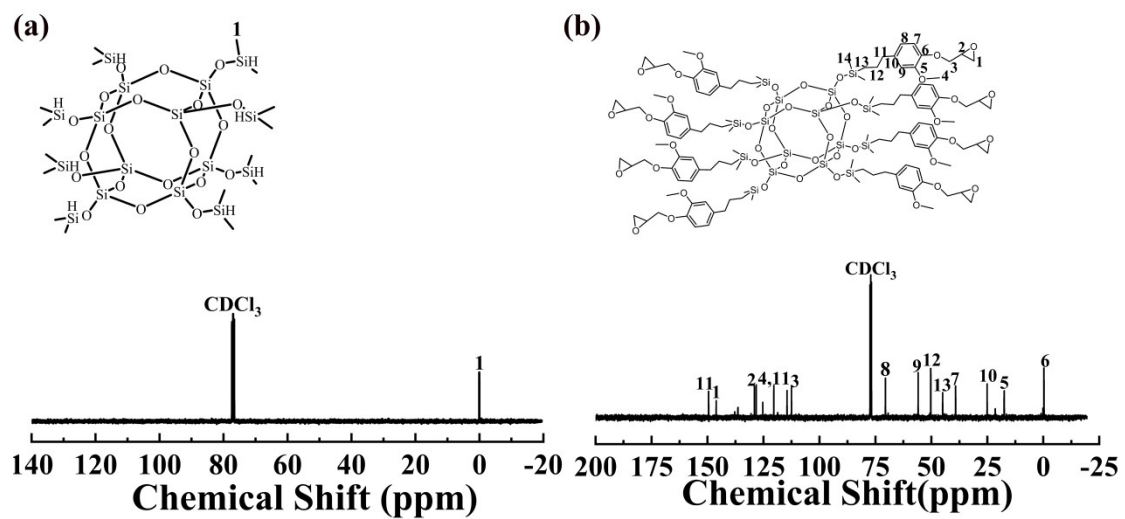

**Fig. S4.**  $^{13}\text{C}$ -NMR spectra of (a) POSS-H and (b) SHEP samples.

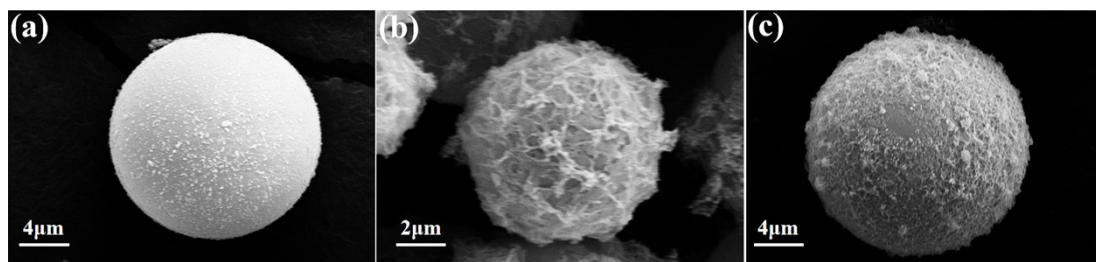

**Fig. S5.** SEM images of the (a) original S4630, modified S4630: (b) non-ultrasonic treatment and (c) ultrasonic treatment.

Fig. S5 displays the SEM images without ultrasonic treatment of the S4630-KBM603. Compared to the ultrasonic treatment process, a large amount of KBM603 is grafted onto the surface of S4630-KBM603, and agglomeration even occurs without ultrasonic treatment. After the ultrasonic treatment, the grafting amount of KBM603 on the surface of S4630-KBM603 is decreased and is homogeneously distributed.

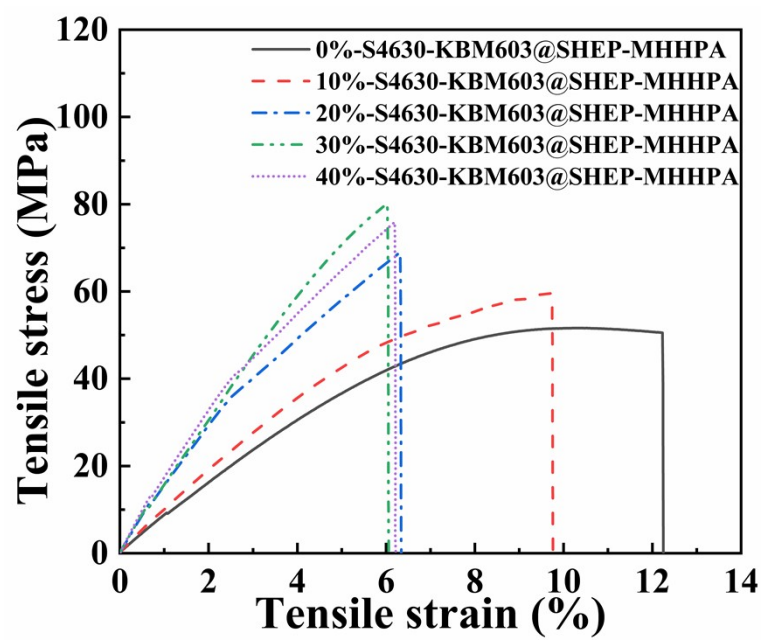

**Fig. S6.** Stress-strain curves of  $x\%$ -S4630-KBM603@SHEP-MHHPA.

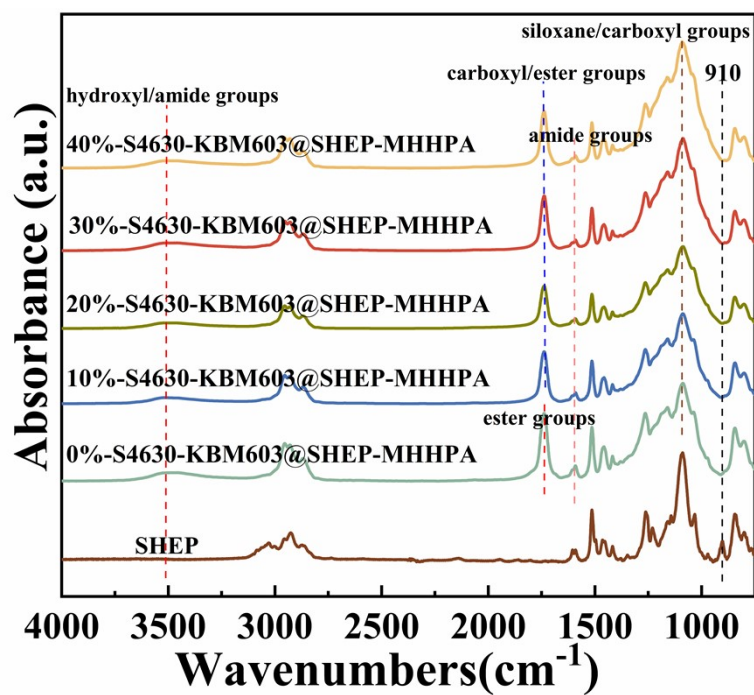

**Fig. S7.** FTIR spectra (epoxy before and after curing).

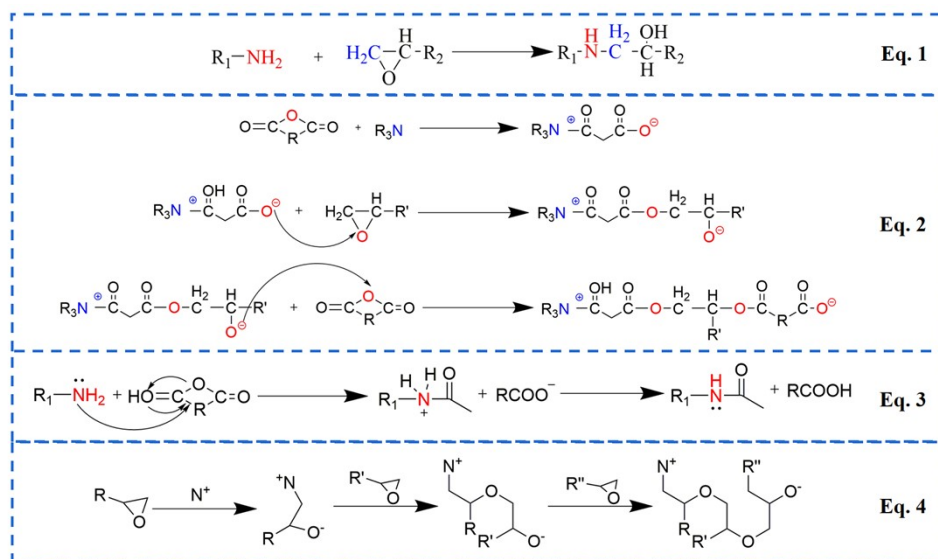

**Fig. S8.** Reaction mechanism diagram among epoxy groups, anhydride groups and amino groups.

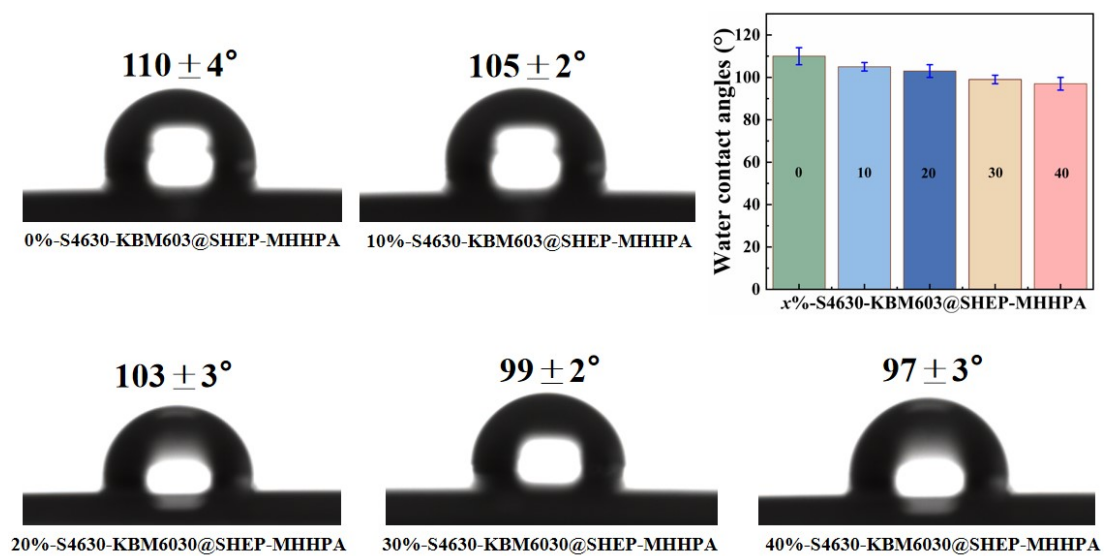

**Fig. S9.** Water contact angle images of  $x\%$ -S4630-KBM603@SHEP-MHHPA.

**Table S1.** Recipes of curing systems for x%-S4630-KBM603@SHEP-MHHPA

| Systems                     | SHEP<br>(g) | S4630-KBM603<br>(g) | MHHP<br>A<br>(g) | BDMA<br>(g) |
|-----------------------------|-------------|---------------------|------------------|-------------|
| 0%-S4630-KBM603@SHEP-MHHPA  | 10.00       | 0.00                | 4.64             | 0.10        |
| 10%-S4630-KBM603@SHEP-MHHPA | 10.00       | 1.00                | 4.64             | 0.10        |
| 20%-S4630-KBM603@SHEP-MHHPA | 10.00       | 2.00                | 4.64             | 0.10        |
| 30%-S4630-KBM603@SHEP-MHHPA | 10.00       | 3.00                | 4.64             | 0.10        |
| 40%-S4630-KBM603@SHEP-MHHPA | 10.00       | 4.00                | 4.64             | 0.10        |

**Table S2.** Average distance of the cured molecular chains.

| Samples                        | $2\theta(^{\circ})$ | $d(\text{\AA})$ |
|--------------------------------|---------------------|-----------------|
| POSS-H                         | 7.86                | 11.23           |
| $x\%$ -S4630-KBM603@SHEP-MHHPA | 7.86                | 11.23           |
